# Supplementary material
Source: PubMed Central journal article supplement (PMC3827641)
Supplement: jn.113.181099_nutrition181099SupplementaryData1.pdf [file jn.113.181099_nutrition181099SupplementaryData1.pdf]

Online Supporting Material

SUPPLEMENTAL TABLE 1 Fortified Foods Identified in WWEIA, NHANES 2007-2008<sup>1</sup>

| Food category                  | Number of fortified foods | Fortified Nutrient |           |           |           |                         |        |         |      |
|--------------------------------|---------------------------|--------------------|-----------|-----------|-----------|-------------------------|--------|---------|------|
|                                |                           | Vitamin A          | Vitamin D | Vitamin E | Vitamin C | Vitamin B <sub>12</sub> | Folate | Calcium | Iron |
|                                |                           |                    |           |           | <i>n</i>  |                         |        |         |      |
| Bars (meal replacement/others) | 19                        | 17                 | 11        | 10        | 12        | 12                      | 12     | 15      | 19   |
| Breakfast tarts                | 2                         | 2                  |           |           |           |                         |        |         | 2    |
| Cereal, cooked                 | 7                         | 2                  |           |           |           |                         | 4      | 7       | 4    |
| Cereal, ready-to-eat           | 144                       | 119                | 112       | 22        | 95        | 126                     | 141    | 62      | 138  |
| Cheese                         | 4                         |                    | 4         |           |           |                         |        |         |      |
| Cocoa/malted milk mix          | 6                         | 3                  | 2         |           | 2         |                         |        | 6       | 4    |
| Drinks, energy                 | 9                         |                    |           |           |           | 9                       |        |         |      |
| Drinks, fruit/fruit juice      | 22                        | 5                  |           | 3         | 21        |                         |        | 4       |      |
| Drinks, thirst quencher        | 3                         |                    |           |           | 1         | 2                       |        |         |      |
| Fruit leather/snacks           | 3                         |                    |           |           | 3         |                         |        |         |      |
| Juice and juice bars           | 9                         | 1                  | 2         | 1         | 6         |                         |        | 4       |      |
| Meal replacements (liquid/mix) | 14                        | 14                 | 12        | 14        | 14        | 14                      | 14     | 14      | 14   |
| Milk                           | 3                         |                    |           |           |           |                         |        | 3       |      |
| Pasta, canned                  | 2                         |                    | 2         |           |           |                         |        |         |      |
| Peanut butter                  | 1                         | 1                  |           | 1         |           |                         | 1      |         | 1    |
| Protein supplements, powder    | 6                         | 4                  | 5         | 3         | 4         | 3                       | 3      | 5       | 5    |
| Soy/rice beverages             | 6                         | 6                  | 6         | 1         |           | 6                       |        | 6       |      |
| Waffles                        | 3                         | 3                  |           |           |           | 3                       |        | 3       | 3    |
| Waters                         | 3                         | 2                  |           | 3         | 3         | 2                       | 2      |         |      |
| All categories combined        | 266                       | 179                | 156       | 58        | 161       | 177                     | 177    | 129     | 190  |

<sup>1</sup>Total number of fortified foods identified by food category, and number of foods within each category containing the fortification vitamin or mineral of interest. List of fortified foods was limited to foods reported consumed by individuals  $\geq 4$  y, WWEIA, NHANES. WWEIA, What We Eat in America.

## Online Supporting Material

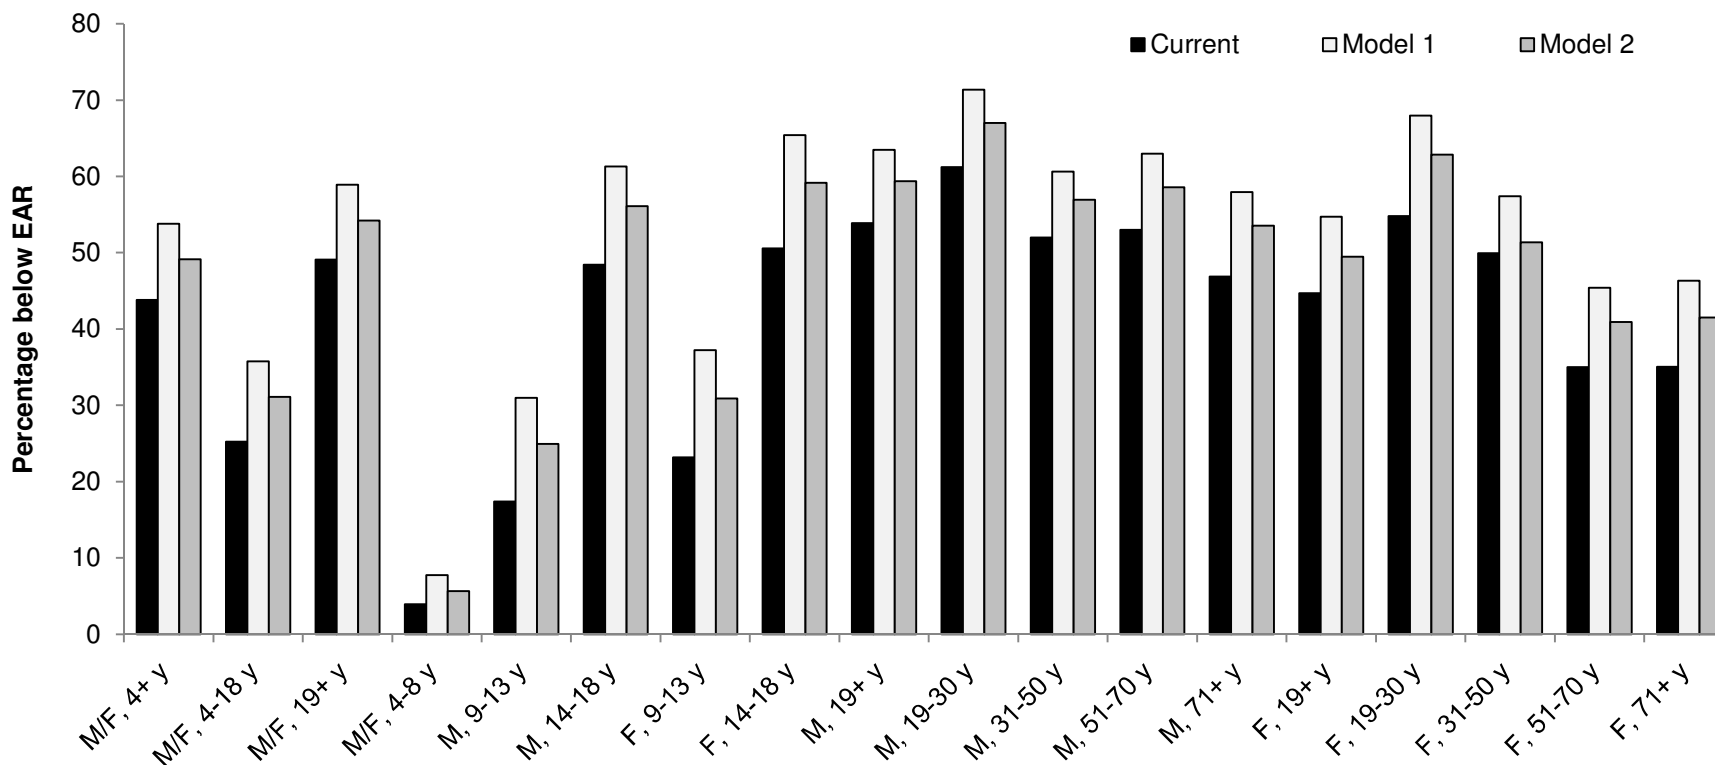

**SUPPLEMENTAL FIGURE 1** Percent of U.S. population with dietary intakes of vitamin A below the EAR based on current intakes and assuming constant %DVs in fortified foods under two potential DV scenarios (data from WWEIA, NHANES 2007-2008, n=7976). Potential DV scenarios: In Model 1, the DV corresponds to the population-weighted EAR and in Model 2, the DV corresponds to the population-coverage RDA; in each scenario, levels of fortified nutrients were adjusted to maintain the current %DV. Usual proportions <EAR were estimated from PC-SIDE (Department of Statistics, Iowa State University) with jackknife weights; covariates included day of recall and weekend/weekday day. DV, Daily Value; EAR, Estimated Average Requirement; PC-Side, Software for Intake Distribution Estimation for the Windows Operating System; WWEIA, What We Eat in America.

## Online Supporting Material

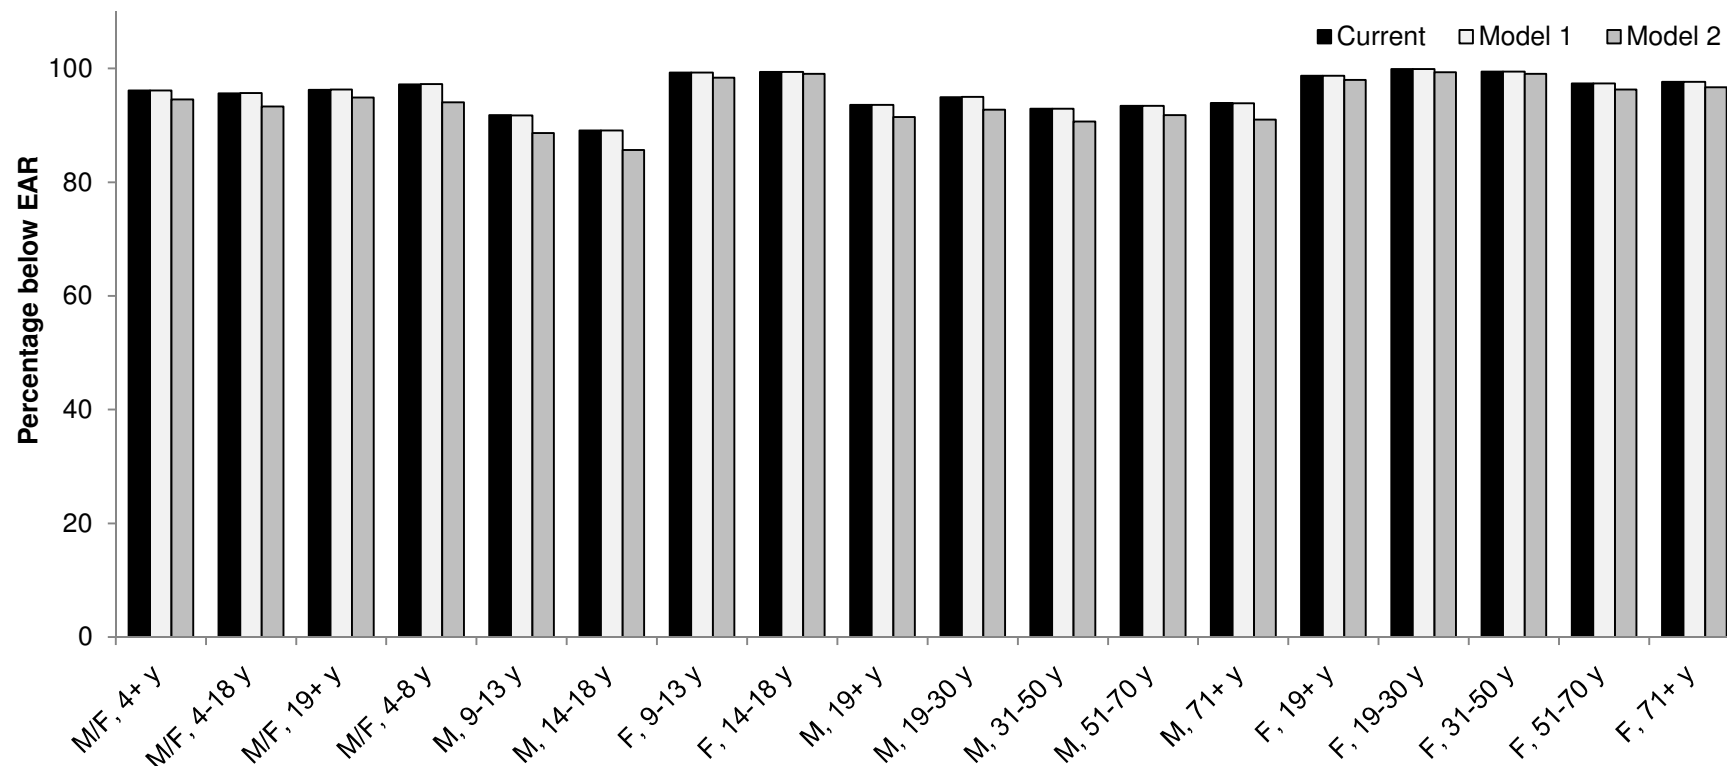

**SUPPLEMENTAL FIGURE 2** Percent of U.S. population with dietary intakes of vitamin D below the EAR based on current intakes and assuming constant %DVs in fortified foods under two potential DV scenarios (data from WWEIA, NHANES 2007-2008, n=7976). Potential DV scenarios: In Model 1, the DV corresponds to the population-weighted EAR and in Model 2, the DV corresponds to the population-coverage RDA; in each scenario, levels of fortified nutrients were adjusted to maintain the current %DV. Usual proportions <EAR were estimated from PC-SIDE (Department of Statistics, Iowa State University) with jackknife weights; covariates included day of recall and weekend/weekday day. DV, Daily Value; EAR, Estimated Average Requirement; PC-Side, Software for Intake Distribution Estimation for the Windows Operating System; WWEIA, What We Eat in America.

## Online Supporting Material

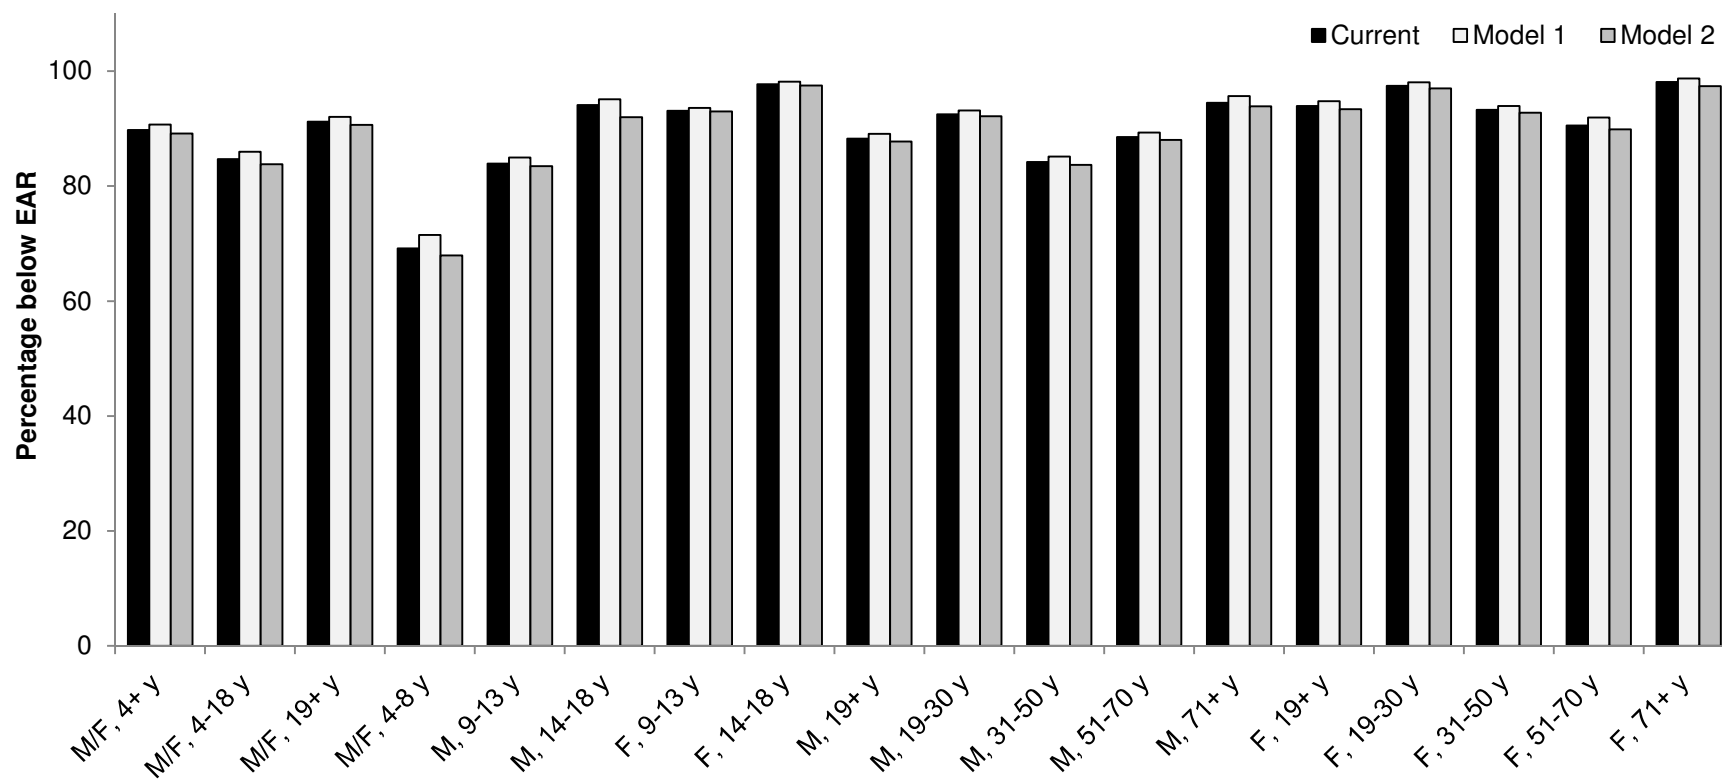

**SUPPLEMENTAL FIGURE 3** Percent of U.S. population with dietary intakes of vitamin E below the EAR based on current intakes and assuming constant %DVs in fortified foods under two potential DV scenarios (data from WWEIA, NHANES 2007-2008, n=7976). Potential DV scenarios: In Model 1, the DV corresponds to the population-weighted EAR and in Model 2, the DV corresponds to the population-coverage RDA; in each scenario, levels of fortified nutrients were adjusted to maintain the current %DV. Usual proportions <EAR were estimated from PC-SIDE (Department of Statistics, Iowa State University) with jackknife weights; covariates included day of recall and weekend/weekday day. DV, Daily Value; EAR, Estimated Average Requirement; PC-Side, Software for Intake Distribution Estimation for the Windows Operating System; WWEIA, What We Eat in America.

## Online Supporting Material

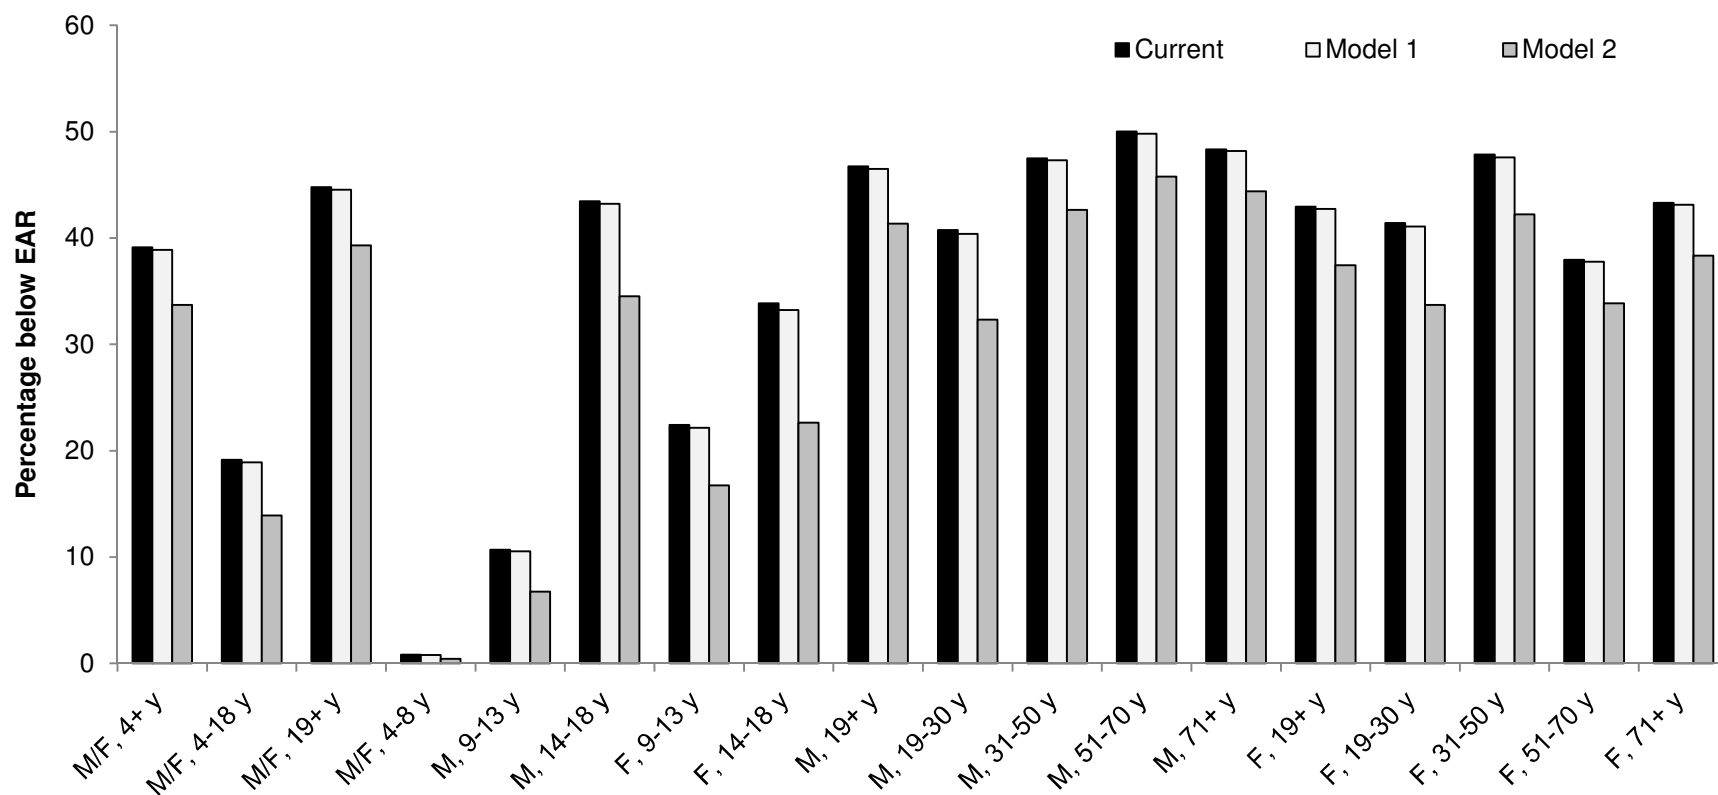

**SUPPLEMENTAL FIGURE 4** Percent of U.S. population with dietary intakes of vitamin C below the EAR based on current intakes and assuming constant %DVs in fortified foods under two potential DV scenarios (data from WWEIA, NHANES 2007-2008, n=7976). Potential DV scenarios: In Model 1, the DV corresponds to the population-weighted EAR and in Model 2, the DV corresponds to the population-coverage RDA; in each scenario, levels of fortified nutrients were adjusted to maintain the current %DV. Usual proportions <EAR were estimated from PC-SIDE (Department of Statistics, Iowa State University) with jackknife weights; covariates included day of recall and weekend/weekday day. DV, Daily Value; EAR, Estimated Average Requirement; PC-Side, Software for Intake Distribution Estimation for the Windows Operating System; WWEIA, What We Eat in America.

## Online Supporting Material

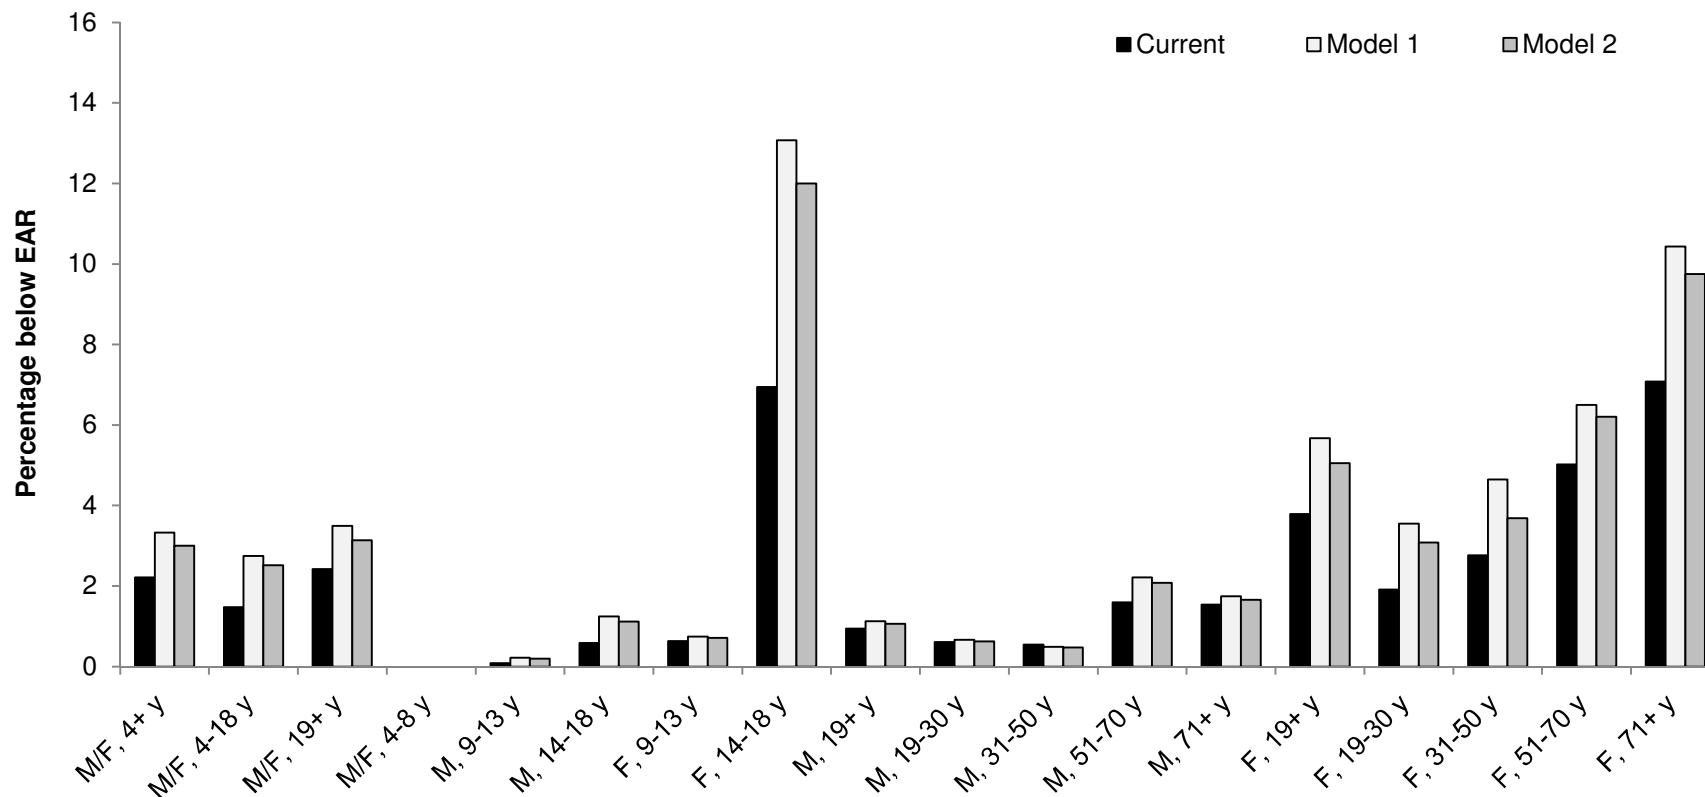

**SUPPLEMENTAL FIGURE 5** Percent of U.S. population with dietary intakes of vitamin B<sub>12</sub> below the EAR based on current intakes and assuming constant %DVs in fortified foods under two potential DV scenarios (data from WWEIA, NHANES 2007-2008, n=7976). Potential DV scenarios: In Model 1, the DV corresponds to the population-weighted EAR and in Model 2, the DV corresponds to the population-coverage RDA; in each scenario, levels of fortified nutrients were adjusted to maintain the current %DV. Usual proportions <EAR were estimated from PC-SIDE (Department of Statistics, Iowa State University) with jackknife weights; covariates included day of recall and weekend/weekday day. DV, Daily Value; EAR, Estimated Average Requirement; PC-Side, Software for Intake Distribution Estimation for the Windows Operating System; WWEIA, What We Eat in America.

## Online Supporting Material

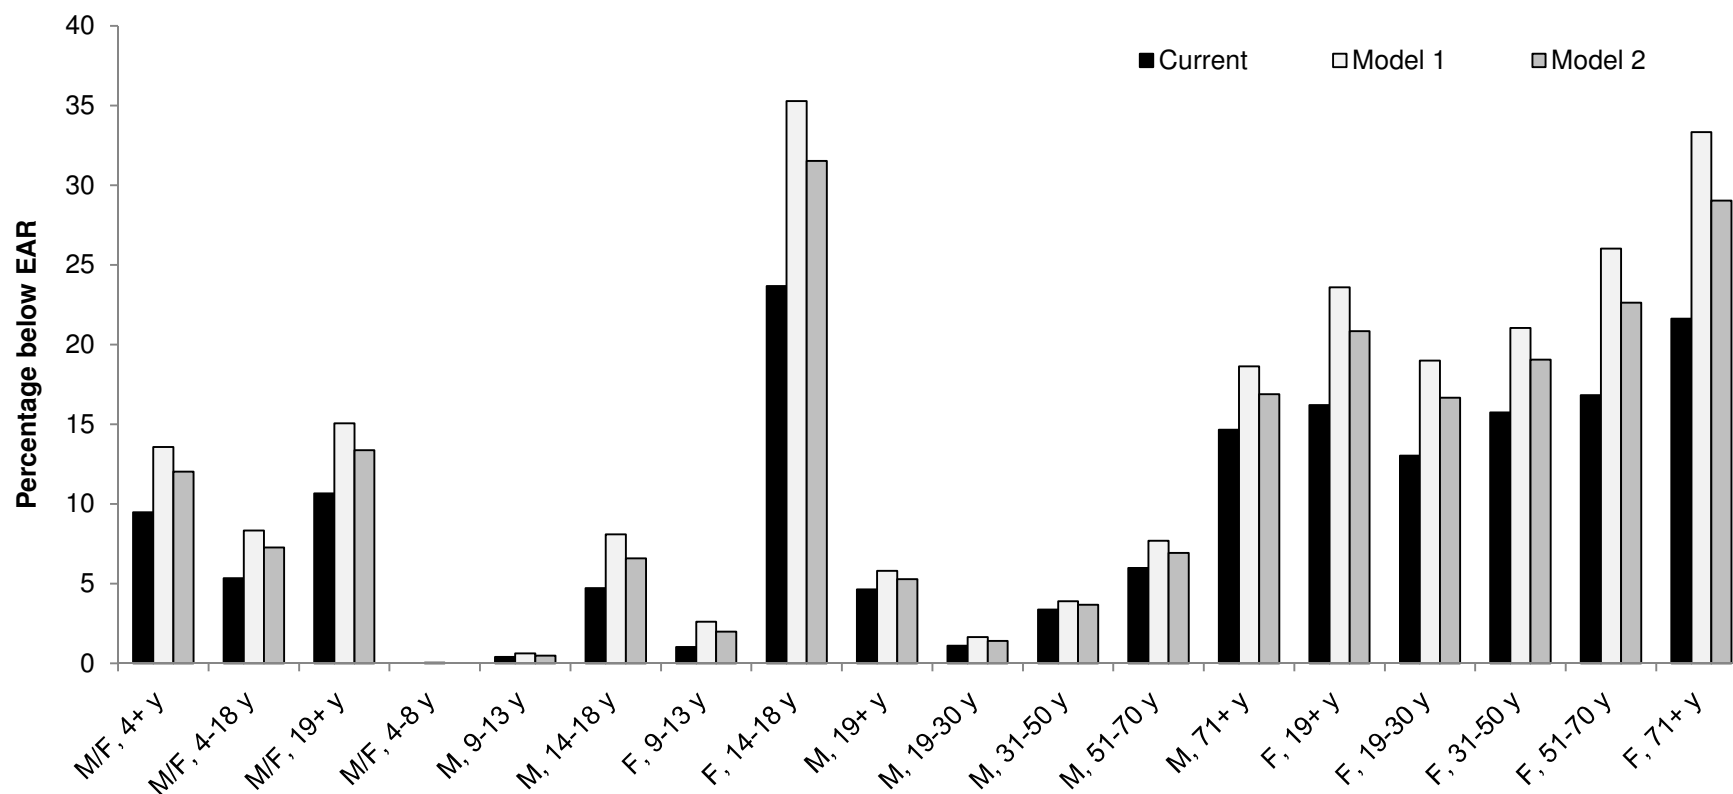

**SUPPLEMENTAL FIGURE 6** Percent of U.S. population with dietary intakes of folate below the EAR based on current intakes and assuming constant %DVs in fortified foods under two potential DV scenarios (data from WWEIA, NHANES 2007-2008, n=7976). We assumed that the revised DV for folate will be in terms of  $\mu\text{g DFE}$ . Potential DV scenarios: In Model 1, the DV corresponds to the population-weighted EAR and in Model 2, the DV corresponds to the population-coverage RDA; in each scenario, levels of fortified nutrients were adjusted to maintain the current %DV. Usual proportions <EAR were estimated from PC-SIDE (Department of Statistics, Iowa State University) with jackknife weights; covariates included day of recall and weekend/weekday day. DFE, Dietary Folate Equivalent; DV, Daily Value; EAR, Estimated Average Requirement; PC-Side, Software for Intake Distribution Estimation for the Windows Operating System; WWEIA, What We Eat in America.

## Online Supporting Material

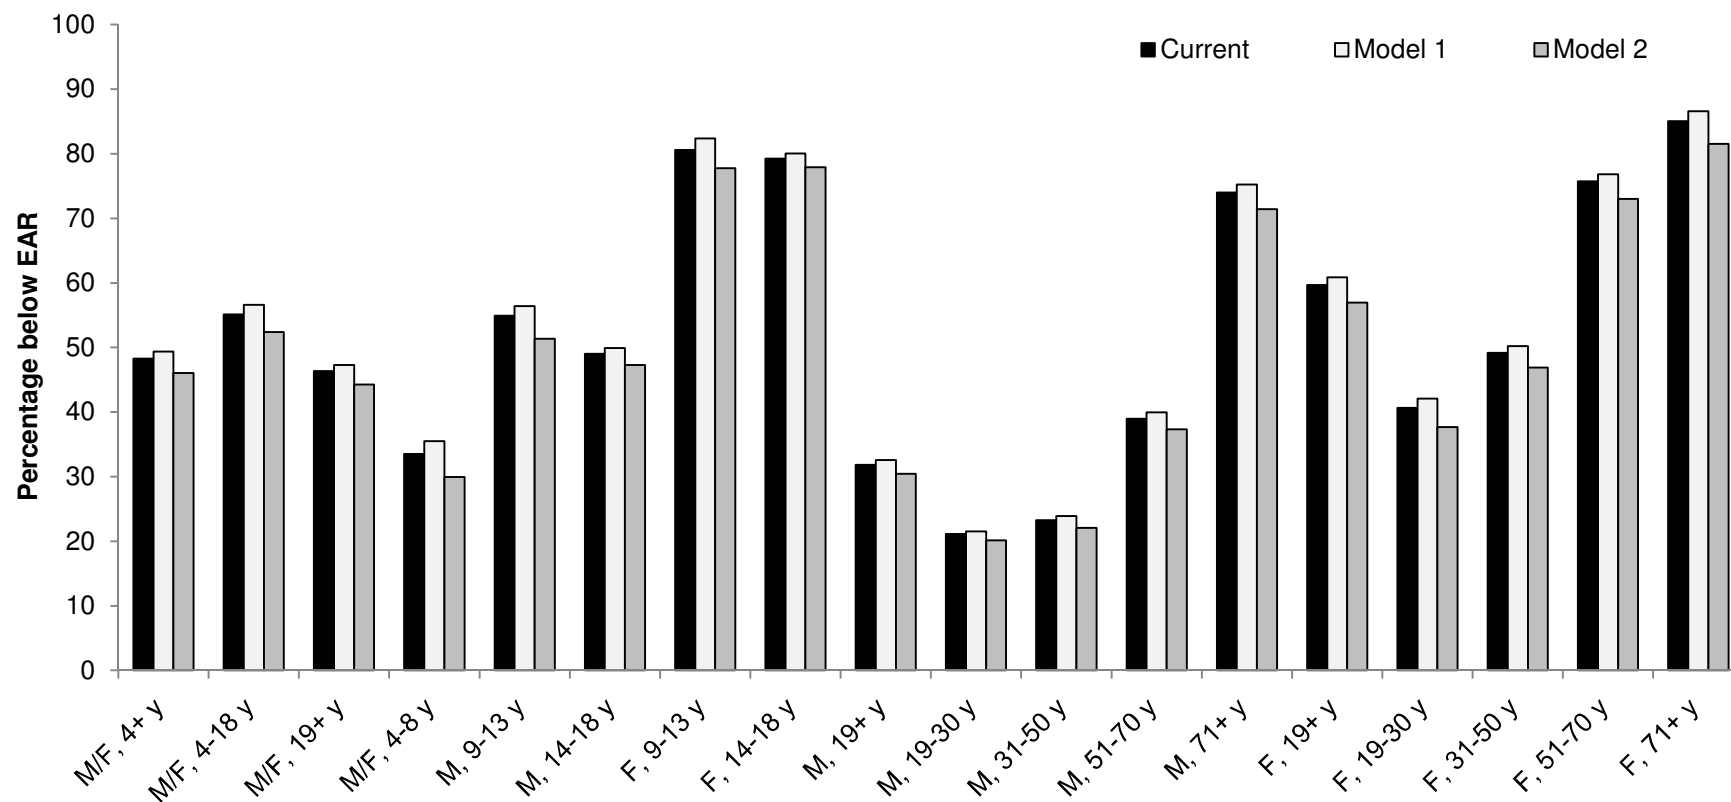

**SUPPLEMENTAL FIGURE 7** Percent of U.S. population with dietary intakes of calcium below the EAR based on current intakes and assuming constant %DVs in fortified foods under two potential DV scenarios (data from WWEIA, NHANES 2007-2008, n=7976). Potential DV scenarios: In Model 1, the DV corresponds to the population-weighted EAR and in Model 2, the DV corresponds to the population-coverage RDA; in each scenario, levels of fortified nutrients were adjusted to maintain the current %DV. Usual proportions <EAR were estimated from PC-SIDE (Department of Statistics, Iowa State University) with jackknife weights; covariates included day of recall and weekend/weekday day. DV, Daily Value; EAR, Estimated Average Requirement; PC-Side, Software for Intake Distribution Estimation for the Windows Operating System; WWEIA, What We Eat in America.



## Online Supporting Material

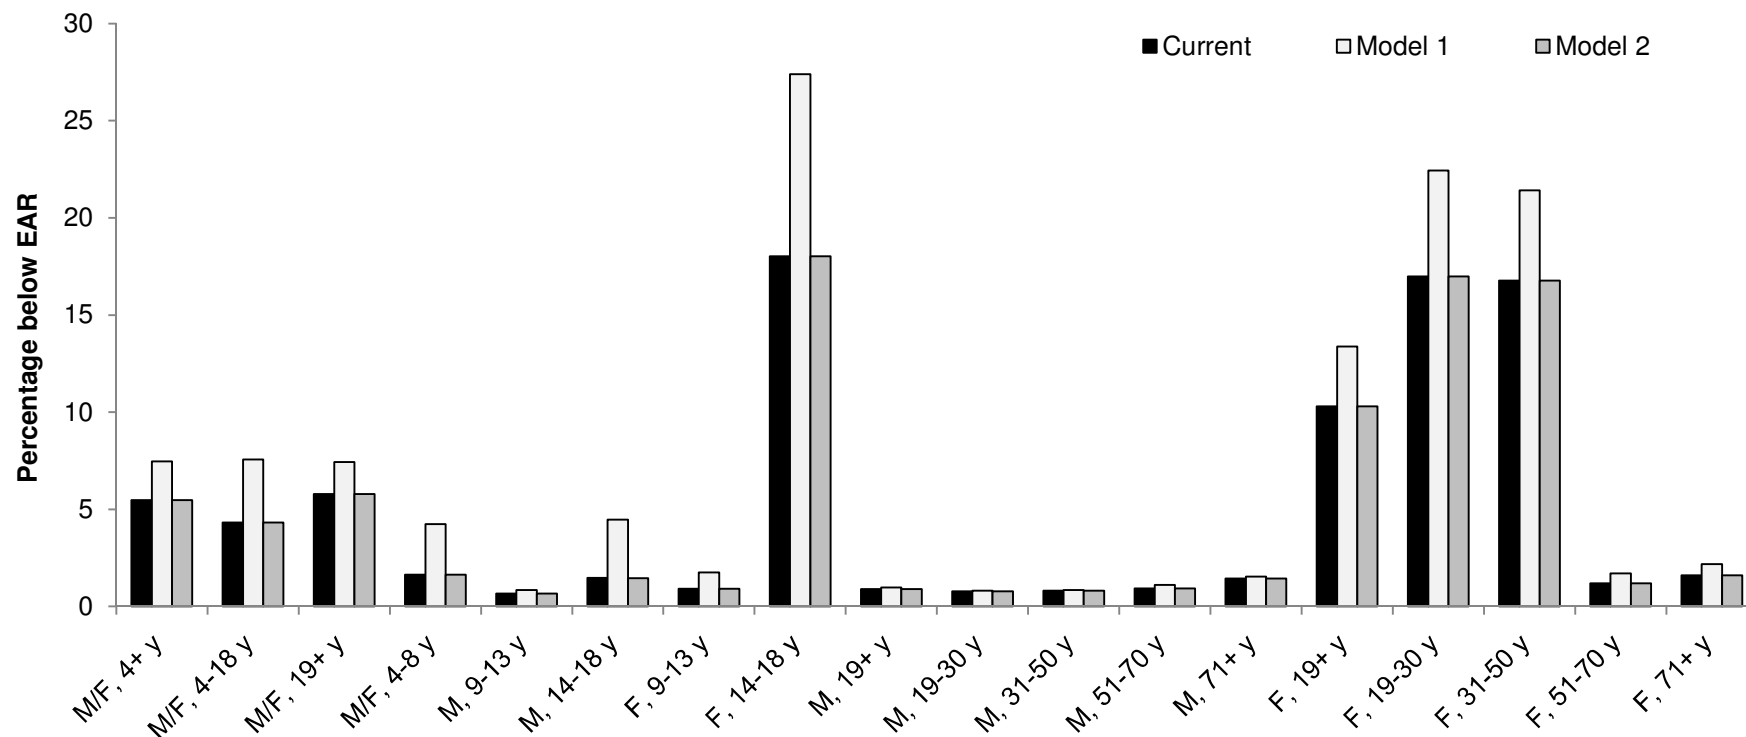

**SUPPLEMENTAL FIGURE 8** Percent of U.S. population with dietary intakes of iron below the EAR based on current intakes and assuming constant %DVs in fortified foods under two potential DV scenarios (data from WWEIA, NHANES 2007-2008, n=7976). Potential DV scenarios: In Model 1, the DV corresponds to the population-weighted EAR and in Model 2, the DV corresponds to the population-coverage RDA; in each scenario, levels of fortified nutrients were adjusted to maintain the current %DV. Usual proportions <EAR were estimated using the probability approach. Usual proportions <EAR were estimated from PC-SIDE (Department of Statistics, Iowa State University) with jackknife weights; covariates included day of recall and weekend/weekday day. DV, Daily Value; EAR, Estimated Average Requirement; PC-Side, Software for Intake Distribution Estimation for the Windows Operating System; WWEIA, What We Eat in America.
